# Supplementary material
Source: PubMed Central journal article supplement (PMC5590608)
Supplement: tpmd170131.SD1.pdf [file tpmd170131.SD1.pdf]

SUPPLEMENTAL TABLE 1  
Prevalence and lethality of pulmonary malaria among patients with Pv malaria

| First author, year (reference)                              | Location    | Study population                              | Type of PM        | No. of <i>P. vivax</i> patients |        |    |        | Frequency, <i>n</i> (%) |              |              |
|-------------------------------------------------------------|-------------|-----------------------------------------------|-------------------|---------------------------------|--------|----|--------|-------------------------|--------------|--------------|
|                                                             |             |                                               |                   | Total                           | Severe | PM | Deaths | PM/total                | PM/severe    | Death/PM     |
| Studies with pediatric population (children under 18 years) |             |                                               |                   |                                 |        |    |        |                         |              |              |
| Genton, 2008 <sup>1</sup>                                   | PNG         | Pv cases in health facilities                 | RD                | 978                             | 86     | 52 | –      | 0.053 (5.3)             | 0.604 (60.4) | –            |
| Kochar, 2010 <sup>2</sup>                                   | India       | Children malaria hospitalizations             | ARDS              | 103                             | 65     | 1  | –      | 0.009 (0.9)             | 0.015 (1.5)  | –            |
| Singh H, 2011 <sup>3</sup>                                  | India       | Malaria patient hospital presentations        | ARDS              | 108                             | 23     | 0  | 0      | 0 (0)                   | 0 (0)        | 0 (0)        |
| Manning, 2011 <sup>4</sup>                                  | PNG         | Children with severe malaria hospitalizations | RD                | 27                              | 27     | 8  | 1      | 0.296 (29.6)            | 0.296 (29.6) | 0.125 (12.5) |
| Lança, 2012 <sup>5</sup>                                    | Brazil      | Pv pediatric hospitalizations                 | ARDS              | 24                              | 24     | 3  | 0      | 0.125 (12.5)            | 0.125 (12.5) | 0(0)         |
| Sharma, 2012 <sup>6</sup>                                   | India       | Patients admitted to hospital                 | ARDS              | 105                             | 46     | 9  | 7      | 0.085 (8.5)             | 0.195 (19.5) | 0.778 (77.8) |
| Yadav, 2012 <sup>7</sup>                                    | India       | Severe vivax malaria                          | ARDS              | 131                             | 131    | 3  | 2      | 0.022 (2.2)             | 0.022 (2.2)  | 0.667 (66.7) |
| Ketema, 2013 <sup>8</sup>                                   | Ethiopia    | Children admissions to hospital               | RD                | 156                             | 139    | 3  | –      | 0.019 (1.9)             | 0.021 (2.1)  | 0 (0)        |
| Gehlawat, 2013 <sup>9</sup>                                 | India       | Severe vivax in children                      | ARDS              | 18                              | 18     | 1  | 1      | 0.055 (5.5)             | 0.055 (5.5)  | 1 (100)      |
| Bhattacharjee P, 2013 <sup>10</sup>                         | India       | Pv pediatric hospitalizations                 | ARDS              | 168                             | 168    | 2  | 0      | 0.011 (1.1)             | 0.011 (1.1)  | 0 (0)        |
| Singh, 2013 <sup>11</sup>                                   | India       | Patients admitted to hospital                 | ARDS              | 61                              | 38     | 5  | 3      | 0.082 (8.2)             | 0.131 (13.1) | 0.6 (60)     |
| Sharma, 2013 <sup>12</sup>                                  | India       | Pv pediatric hospitalizations                 | ARDS              | 261                             | 54     | 3  | –      | 0.011 (1.1)             | 0.055 (5.5)  | 0 (0)        |
| Goyal, 2014 <sup>13</sup>                                   | India       | Pv hospital admissions                        | ARDS              | 47                              | –      | 2  | 1      | 0.042 (4.2)             | –            | 0.5 (50)     |
| Kumari, 2014 <sup>14</sup>                                  | India       | Pv pediatric hospitalizations                 | ARDS/<br>PO       | 50                              | 13     | 2  | 2      | 0.04 (4)                | 0.153 (15.3) | 1 (100)      |
| Total (pediatric population)                                |             |                                               |                   | 2237                            | 832    | 94 | 17     | 0.042 (4.2)             | 0.113 (11.3) | 0.181 (18.1) |
| Studies with adult population                               |             |                                               |                   |                                 |        |    |        |                         |              |              |
| Habib, 2004 <sup>15</sup>                                   | Singapore   | Patients with imported malaria                | RD                | 29                              | –      | 1  | 0      | 0.034 (3.4)             | –            | 0 (0)        |
| Kotwal, 2005 <sup>16</sup>                                  | Afghanistan | American soldiers returning from Afghanistan  | ARDS              | 38                              | 1      | 1  | 0      | 0.026 (2.6)             | 1 (100)      | 0 (0)        |
| Kochar, 2005 <sup>17</sup>                                  | India       | Severe vivax malaria                          | ARDS<br>and<br>PO | 11                              | 11     | 4  | 2      | 0.363 (36.3)            | 0.363 (36.3) | 0.5 (50)     |
| Sharma, 2009 <sup>18</sup>                                  | India       | Records of malaria cases                      | ARDS              | 221                             | –      | 3  | 3      | 0.013 (1.3)             | –            | 1 (100)      |
| Kochar, 2009 <sup>19</sup>                                  | India       | Patients admitted to hospital                 | ARDS              | 456                             | 40     | 4  | 2      | 0.008 (0.8)             | 1 (100)      | 0.5 (50)     |
| George, 2010 <sup>20</sup>                                  | India       | Severe Pv admissions                          | ARDS              | 30                              | 30     | 1  | 1      | 0.033 (3.3)             | 0.033 (3.3)  | 1 (100)      |
| Nayak K, 2011 <sup>21</sup>                                 | India       | Severe malaria cases                          | ARDS              | 80                              | 80     | 4  | 4      | 0.05 (5)                | 0.05 (5)     | 1 (100)      |
| Srivastava, 2011 <sup>22</sup>                              | India       | Patient hospital presentations                | ARDS              | 50                              | 41     | 3  | 0      | 0.06 (6)                | 0.073 (7.3)  | 0 (0)        |
| Limaye, 2012 <sup>23</sup>                                  | India       | Patients admitted to hospital                 | ARDS              | 336                             | 50     | 10 | 6      | 0.029 (2.9)             | 0.2 (20)     | 0.6 (60)     |
| Mehmood A, 2012 <sup>24</sup>                               | Pakistan    | Pv cases in Emergency Dept.                   | ARDS              | 97                              | –      | 1  | 0      | 0.01 (1)                | –            | 0 (0)        |
| Singh, 2013 <sup>25</sup>                                   | India       | Patients admitted to hospital                 | ARDS              | 140                             | 63     | 3  | 2      | 0.021 (2.1)             | 0.047 (4.7)  | 0.667 (66.7) |
| Barber, 2013 <sup>26</sup>                                  | Malaysia    | Hospital admitted patients                    | RD                | 43                              | 7      | 1  | 0      | 0.023 (2.3)             | 0.142 (14.2) | 0 (0)        |
| Rizvi, 2013 <sup>27</sup>                                   | India       | Patients admitted to hospital                 | ARDS              | 172                             | 62     | 6  | 2      | 0.035 (3.5)             | 0.097 (9.7)  | 0.333 (33.3) |
| Quispe, 2014 <sup>28</sup>                                  | Peru        | Pv malaria cases                              | Lung injury       | 6502                            | 81     | 6  | 1      | 0.001 (0.1)             | 0.074 (7.4)  | 0.166 (16.6) |
| Saravu, 2014 <sup>29</sup>                                  | India       | Hospitalized severe malaria cases             | ARDS<br>and<br>PO | 585                             | 99     | 34 | 2      | 0.058 (5.8)             | 0.343 (34.3) | 0.058 (5.8)  |
| Muley, 2014 <sup>30</sup>                                   | India       | Hospital admissions                           | ARDS              | 100                             | –      | 6  | 1      | 0.06 (6)                | –            | 0.166 (16.6) |
| Chung, 2014 <sup>31</sup>                                   | Singapore   | Malaria hospital admissions                   | PO                | 127                             | 43     | 2  | 0      | 0.015 (1.5)             | 0.046 (4.6)  | 0 (0)        |
| Siqueira, 2015 <sup>32</sup>                                | Brazil      | Patients admitted to hospital                 | ARDS              | 10283                           | 40     | 7  | 1      | 0.0007 (0.07)           | 0.175 (17.5) | 0.143 (14.3) |
| Siqueira, 2015 <sup>32</sup>                                | India       | Patients admitted to hospital                 | ARDS              | 843                             | 157    | 5  | 5      | 0.005 (0.5)             | 0.031 (3.1)  | 1 (100)      |
| Jain, 2016 <sup>33</sup>                                    | India       | Patients in Emergency Dept.                   | ARDS              | 48                              | 25     | 2  | 1      | 0.041 (4.1)             | 0.08 (8)     | 0.5 (50)     |

(continued)

SUPPLEMENTAL TABLE 1  
Continued

| First author, year<br>(reference)                                     | Location  | Study population                                                                 | Type of PM   | No. of <i>P. vivax</i> patients |        |     |        | Frequency, <i>n</i> (%) |              |              |
|-----------------------------------------------------------------------|-----------|----------------------------------------------------------------------------------|--------------|---------------------------------|--------|-----|--------|-------------------------|--------------|--------------|
|                                                                       |           |                                                                                  |              | Total                           | Severe | PM  | Deaths | PM/total                | PM/severe    | Death/PM     |
| Total (adult population)                                              |           |                                                                                  |              | 20193                           | 830    | 104 | 33     | 0.005 (0.5)             | 0.125 (12.5) | 0.317 (31.7) |
| Studies with no distinction between children and adults developing PM |           |                                                                                  |              |                                 |        |     |        |                         |              |              |
| Barcus, 2007 <sup>34</sup>                                            | Indonesia | Malaria hospital admissions                                                      | ARD          | 1135                            | 36     | 2   | 1      | 0.001 (0.1)             | 0.055 (5.5)  | 0.5 (50)     |
| Tjitra, 2008 <sup>35</sup>                                            | PNG       | Malaria patients presenting to hospital                                          | RD           | 19050                           | 1570   | 78  | 11     | 0.004 (0.4)             | 0.049 (4.9)  | 0.141 (14.1) |
| Nayak, 2009 <sup>36</sup>                                             | India     | pregnant and non-pregnant patients admitted to hospital                          | ARDS         | 169                             | –      | 5   | 0      | 0.029 (2.9)             | –            | 0 (0)        |
| Alexandre, 2010 <sup>37</sup>                                         | Brazil    | Pv hospital admissions                                                           | ARDS         | 358                             | 17     | 2   | 1      | 0.005 (0.5)             | 0.117 (11.7) | 0.5 (50)     |
| Andrade, 2010 <sup>38</sup>                                           | Brazil    | all patients with malaria (active and passive case detection + hospitalizations) | RF           | 129                             | 18     | 6   | 4      | 0.046 (4.6)             | 0.315 (31.5) | 0.666 (66.6) |
| Nadkar M, 2012 <sup>39</sup>                                          | India     | Severe vivax cases                                                               | ALI/<br>ARDS | 488                             | 488    | 8   | 5      | 0.016 (1.6)             | 0.016 (1.6)  | 0.625 (62.5) |
| Arboleda, 2012 <sup>40</sup>                                          | Colombia  | Hospitalized vivax patients                                                      | ARDS         | 359                             | 83     | 1   | 0      | 0.002 (0.2)             | 0.012 (1.2)  | 0 (0)        |
| Nurleila, 2012 <sup>41</sup>                                          | Indonesia | In and outpatients with malaria                                                  | RD           | 1541                            | 199    | 10  | –      | 0.006 (0.6)             | 0.05 (5)     | –            |
| Aatif, 2013 <sup>42</sup>                                             | Pakistan  | Patients admitted to hospital                                                    | ARDS         | 107                             | –      | 1   | 1      | 0.009 (0.9)             | –            | 1 (100)      |
| Jain V, 2013 <sup>43</sup>                                            | India     | Patients admitted to hospital                                                    | RD           | 198                             | 22     | 7   | 1      | 0.035 (3.5)             | 0.318 (31.8) | 0.143 (14.3) |
| Nayak, 2013 <sup>44</sup>                                             | India     | Consecutive patients with severe malaria                                         | RD           | 459                             | 60     | 13  | 0      | 0.028 (2.8)             | 0.217 (21.7) | 0 (0)        |
| Singh, 2013 <sup>45</sup>                                             | India     | Pv hospital admissions                                                           | ARDS         | 110                             | 19     | 2   | 0      | 0.018 (1.8)             | 0.105 (10.5) | 0 (0)        |
| Mendonça V, 2014 <sup>46</sup>                                        | Brazil    | Complicated vivax cases                                                          | RF           | 100                             | 31     | 5   | –      | 0.05 (5)                | 0.163 (16.3) | –            |
| Hwang, 2014 <sup>47</sup>                                             | US        | Malaria cases                                                                    | ARDS         | 12152                           | 61     | 35  | –      | 0.003 (0.3)             | 0.573 (57.3) | –            |
| Chaparro-Narvaez, 2016 <sup>48</sup>                                  | Colombia  | Malaria cases                                                                    | RD and<br>PO | 390946                          | 1126   | 78  | –      | 0.0002 (0.02)           | 0.069 (6.9)  | –            |
| Demissie, 2016 <sup>49</sup>                                          | Ethiopia  | Malaria patients presenting to hospital                                          | RD           | 384                             | 55     | 6   | 0      | 0.015 (1.5)             | 0.109 (10.9) | 0 (0)        |
| Total (no distinction between children and adult population)          |           |                                                                                  |              | 427685                          | 3786   | 259 | 24     | 0.0006 (0.06)           | 0.068 (6.8)  | 0.092 (9.2)  |
| Total (all studies)                                                   |           |                                                                                  |              | 450115                          | 5448   | 453 | 74     | 0.001 (0.1)             | 0.083 (8.33) | 0.163 (16.3) |

ALI = acute lung injury; ARD = acute respiratory distress; ARDS = acute respiratory distress syndrome; PM = pulmonary malaria; PNG = Papua New Guinea; PO = pulmonary edema; Pv = *Plasmodium vivax*; RD = respiratory distress; US = United States. Respiratory classifications were used as in original article. PM refers to any evidence of respiratory complication detected by any clinical and/or laboratorial alteration.

## SUPPLEMENTAL REFERENCES

- Genton B, D'Acromont V, Rare L, Baea K, Reeder JC, Alpers MP, Muller I, 2008. Plasmodium vivax and mixed infections are associated with severe malaria in children: a prospective cohort study from Papua New Guinea. *PLoS Med* 5: e127.
- Kochar DK, Tanwar GS, Khatri PC, Kochar SK, Sengar GS, Gupta A, Kochar A, Middha S, Acharya J, Saxena V, Pakalapati D, Garg S, Ashish Das A, 2010. Clinical features of children hospitalized with malaria—a study from Bikaner, northwest India. *Am J Trop Med Hyg* 83: 981–989.
- Singh H, Parakh A, Basu S, Rath B, 2011. Plasmodium vivax malaria: is it actually benign? *J Infect Public Health* 4: 91–95.
- Manning L, Laman M, Law I, Bona C, Aipit S, Teine D, Warrell J, Rosanas-Urgell A, Lin E, Kiniboro B, Vince J, Hwaiwhanje I, Karunajeewa H, Michon P, Siba P, Mueller I, Davis TME, 2011. Features and prognosis of severe malaria caused by Plasmodium falciparum, Plasmodium vivax and mixed Plasmodium species in Papua New Guinean children. *PLoS One* 6: e29203.
- Lança EFC, Magalhães BML, Vitor-Silva S, Siqueira AM, Benzecry SG, Alexandre MA, O'Brien C, Bassat Q, Lacerda MV, 2012. Risk factors and characterization of Plasmodium vivax-associated admissions to pediatric intensive care units in the Brazilian Amazon. *PLoS One* 7: e35406.
- Sharma R, Gohain S, Chandra J, Kumar V, Chopra A, Chatterjee S, Aneja S, Dutta AK, 2012. Plasmodium vivax malaria admissions and risk of mortality in a tertiary-care children's hospital in North India. *Paediatr Int Child Health* 32: 152–157.
- Yadav D, Chandra J, Aneja S, Kumar V, Kumar P, Dutta AK, 2012. Changing Profile of Severe Malaria in North Indian Children. *Indian J Pediatr* 79: 483–487.
- Ketema T, Bacha K, 2013. Plasmodium vivax associated severe malaria complications among children in some malaria endemic areas of Ethiopia. *BMC Public Health* 13: 637.
- Gehlawat VK, Arya V, Kaushik JS, Gathwala G, 2013. Clinical spectrum and treatment outcome of severe malaria caused by Plasmodium vivax in 18 children from northern India. *Pathog Glob Health* 107: 210–214.
- Bhattacharjee P, 2013. The clinicopathologic manifestations of Plasmodium vivax malaria in children: a growing menace. *J Clin Diagn Res* 7: 861–867.
- Singh R, 2013. A comparative study of clinical profiles of vivax and falciparum malaria in children at a tertiary care centre in Uttarakhand. *J Clin DIAGNOSTIC Res* 7: 2234–2237.
- Sharma S, 2013. The unusual presentation of a usual organism—the changing spectrum of the clinical manifestations of Plasmodium vivax malaria in children: a retrospective study. *J Clin Diagn Res* 7: 1964–1967.
- Goyal JP, Makwana AM, 2014. Comparison of clinical profile between P. vivax and P. falciparum malaria in children: a tertiary care centre perspective from India. *Malar Res Treat* 2014: 1–4.
- Kumari M, Ghildiyal R, 2014. Clinical profile of Plasmodium vivax malaria in children and study of severity parameters in relation to mortality: a tertiary care centre perspective in Mumbai, India. *Malar Res Treat* 2014: 1–6.
- Habib AG, Singh KS, 2004. Respiratory distress in nonimmune adults with imported malaria. *Infection* 32: 356–359.
- Kotwal RS, Wenzel RB, Sterling RA, Porter WD, Jordan NN, Petruccioli BP, 2005. An outbreak of malaria in US Army Rangers returning from Afghanistan. *JAMA* 293: 212–216.
- Kochar DK, Saxena V, Singh N, Kochar SK, Kumar SV, Das A, 2005. Plasmodium vivax Malaria. *Emerg Infect Dis* 11: 132–134.
- Sharma A, Khanduri U, 2009. How benign is benign tertian malaria? *J Vector Borne Dis* 46: 141–144.
- Kochar DK, Das A, Kochar SK, Saxena V, Sirohi P, Garg S, Kochar A, Khatri MP, Gupta V, 2009. Severe Plasmodium vivax malaria: a report on serial cases from Bikaner in northwestern India. *Am J Trop Med Hyg* 80: 194–198.
- George P, Alexander LM, 2010. A study on the clinical profile of complicated Plasmodium vivax mono-infections. *Asian Pac J Trop Med* 3: 560–562.
- Nayak KC, Kumar S, Tanwar RS, Kulkarni V, Gupta A, Sharma P, Sirohi P, Ratan P, 2011. A study on pulmonary manifestations in patients with malaria from northwestern India (Bikaner). 48: 219–223.
- Srivastava S, Ahmad S, Shirazi N, Kumar Verma S, Puri P, 2011. Retrospective analysis of vivax malaria patients presenting to tertiary referral centre of Uttarakhand. *Acta Trop* 117: 82–85.
- Limaye CS, Londhey VA, Nabar ST, 2012. The study of complications of vivax malaria in comparison with falciparum malaria in Mumbai. *J Assoc Physicians India* 60: 15–18.
- Mehmood A, Ejaz K, Ahmed T, 2012. Severity of Plasmodium vivax Malaria in Karachi: a cross-sectional study. *J Infect Dev Ctries* 6: 664–670.
- Singh S, Singh R, Ahmad N, 2013. Complications of vivax malaria in Uttarakhand, India. *Int J Res Med Sci* 1: 532–535.
- Barber BE, William T, Grigg MJ, Menon J, Auburn S, Marfurt J, Anstey NM, Yeo TW, 2013. A prospective comparative study of knowlesi, falciparum, and vivax malaria in Sabah, Malaysia: high proportion with severe disease from Plasmodium knowlesi and Plasmodium vivax but no mortality with early referral and artesunate therapy. *Clin Infect Dis* 56: 383–397.
- Rizvi I, Tripathi D, Zaman S, Zaidi N, Chughtai A, Beg M, 2013. Complications associated with Plasmodium vivax malaria: a retrospective study from a tertiary care hospital based in western Uttar Pradesh, India. *Ann Afr Med* 12: 155.
- Quispe AM, Pozo E, Guerrero E, Durand S, Baldeviano GC, Edgel KA, Graf PCF, Lescano AG, 2014. Plasmodium vivax hospitalizations in a monoendemic malaria region: severe vivax malaria? *Am J Trop Med Hyg* 91: 11–17.
- Saravu K, Rishikesh K, Kamath A, Shastry AB, 2014. Severity in Plasmodium vivax malaria claiming global vigilance and exploration—a tertiary care centre-based cohort study. *Malar J* 13: 304.
- Muley A, Lakhani J, Bhirud S, Patel A, 2014. Thrombocytopenia in Plasmodium vivax malaria: how significant? *J Trop Med* 2014: 1–4.
- Chung SJ, Low JGH, Wijaya L, 2014. Malaria in a tertiary hospital in Singapore—clinical presentation, treatment and outcome: an eleven year retrospective review. *Travel Med Infect Dis* 12 (6 Pt B): 738–744.
- Siqueira AM, Lacerda MV, Magalhães BML, Mourão MP, Melo GC, Alexandre MA, Alecrim MG, Kochar D, Kochar S, Kochar A, Nayak K, del Portillo H, Guinovart C, Alonso P, Bassat Q, 2015. Characterization of Plasmodium vivax-associated admissions to reference hospitals in Brazil and India. *BMC Med* 13: 57.
- Jain A, Kaushik R, Kaushik RM, 2016. Malarial hepatopathy: clinical profile and association with other malarial complications. *Acta Trop* 159: 95–105.
- Barcus MJ, Basri H, Picarima H, Manyakori C, Sekartuti, Elyazar I, Bangs MJ, Maguire JD, Baird JK, 2007. Demographic risk factors for severe and fatal vivax and falciparum malaria among hospital admissions in northeastern Indonesian Papua. *Am J Trop Med Hyg* 77: 984–991.
- Tijtra E, Anstey NM, Sugiarto P, Warikar N, Kenangalem E, Karayana M, Lampah DA, Price RN, 2008. Multidrug-resistant Plasmodium vivax associated with severe and fatal malaria: a prospective study in Papua, Indonesia. *PLoS Med* 5: e128.
- Nayak KC, Khatri MP, Gupta BK, Sirohi P, Choudhary V, Verma SK, Beniwal S, 2009. Spectrum of vivax malaria in pregnancy and its outcome: a hospital-based study. *J Vector Borne Dis* 46: 299–302.
- Alexandre MA, Ferreira CO, Siqueira AM, Magalhães BL, Mourão MPG, Lacerda MV, Alecrim MDGC, 2010. Severe Plasmodium vivax malaria, Brazilian Amazon. *Emerg Infect Dis* 16: 1611–1614.
- Andrade BB, Reis-Filho A, Souza-Neto SM, Clarêncio J, Camargo LMA, Barral A, Barral-Netto M, 2010. Severe Plasmodium vivax malaria exhibits marked inflammatory imbalance. *Malar J* 9: 13.
- Nadkar MY, Huchche AM, Singh R, Pazare AR, 2012. Clinical profile of severe Plasmodium vivax malaria in a tertiary care centre in Mumbai from June 2010–January 2011. *J Assoc Physicians India* 60: 11–13.
- Arboleda M, Pérez MF, Fernández D, Usuga LY, Meza M, 2012. Clinical and laboratory profile of Plasmodium vivax malaria patients hospitalized in Apartadó, Colombia [in Spanish]. *Bio-médica Rev del Inst Nac Salud* 32 (Suppl 1): 58–67.
- Nurleila S, Syafruddin D, Elyazar IRF, Baird JK, 2012. Serious and fatal illness associated with falciparum and vivax malaria

- among patients admitted to hospital at west Sumba in eastern Indonesia. *Am J Trop Med Hyg* 87: 41–49.
42. Aatif S, Jamal Q, Altaf A, 2013. Salimullah. Is vivax malaria really benign? A Karachi-based study. *J Pak Med Assoc* 63: 721–724.
  43. Jain V, Agrawal A, Singh N, 2013. Malaria in a tertiary health care facility of Central India with special reference to severe vivax: implications for malaria control. *Pathog Glob Health* 107: 299–304.
  44. Nayak KC, Meena SL, Gupta BK, Kumar S, Pareek V, 2013. Cardiovascular involvement in severe vivax and falciparum malaria. *J Vector Borne Dis* 50: 285–291.
  45. Singh J, Purohit B, Desai A, Savardekar L, Shanbag P, Kshirsagar N, 2013. Clinical manifestations, treatment, and outcome of hospitalized patients with *Plasmodium vivax* malaria in two Indian states: a retrospective study. *Malar Res Treat* 2013: 341862.
  46. Mendonca VRR, Souza LCL, Garcia GC, Magalhaes BML, Lacerda MVG, Andrade BB, Goncalves MS, Barral-Netto M, 2014. DDX39B (BAT1), TNF and IL6 gene polymorphisms and association with clinical outcomes of patients with *Plasmodium vivax* malaria. *Malar J* 13: 278.
  47. Hwang J, Cullen KA, Kachur SP, Arguin PM, Baird JK, 2014. Severe morbidity and mortality risk from malaria in the United States, 1985–2011. *Open Forum Infect Dis* 1: ofu034–ofu034.
  48. Chaparro-Narvaez PE, Lopez-Perez M, Marcela Rengifo L, Padilla J, Herrera S, Arevalo-Herrera M, 2016. Clinical and epidemiological aspects of complicated malaria in Colombia, 2007–2013. *Malar J* 15: 269.
  49. Demissie Y, Ketema T, 2016. Complicated malaria symptoms associated with *Plasmodium vivax* among patients visiting health facilities in Mendi town, northwest Ethiopia. *BMC Infectious Dis* 16: 436.

SUPPLEMENTAL TABLE 2

Frequency of pulmonary impairment in *Plasmodium vivax* malaria according to groups of localities and WHO region

| WHO region (no. of studies) localities             | No. of <i>P. vivax</i> patients |        |     |        | Prevalence, <i>n</i> (%) |              |              |
|----------------------------------------------------|---------------------------------|--------|-----|--------|--------------------------|--------------|--------------|
|                                                    | Total                           | Severe | PM  | Deaths | PM/total                 | PM/severe    | Death/PM     |
| African region (2)                                 | 540                             | 194    | 9   | 0      | 0.016 (1.6)              | 0.046 (4.6)  | 0 (0)        |
| Kersa and Halaba districts, Ethiopia               |                                 |        |     |        |                          |              |              |
| Mendi Town, Ethiopia                               |                                 |        |     |        |                          |              |              |
| Region of the Americas (8)                         | 420,853                         | 1,482  | 143 | 7      | 0.0003 (0.03)            | 0.096 (9.6)  | 0.049 (4.9)  |
| Manaus, Amazonas, Brazil                           |                                 |        |     |        |                          |              |              |
| Riverine communities and Buritis, Rondônia, Brazil |                                 |        |     |        |                          |              |              |
| Apartabó, Antioquia, Colombia                      |                                 |        |     |        |                          |              |              |
| SIVIGILA, Colombia                                 |                                 |        |     |        |                          |              |              |
| Sullana, Piura, Peru                               |                                 |        |     |        |                          |              |              |
| NMSS, United States                                |                                 |        |     |        |                          |              |              |
| Eastern Mediterranean region (3)                   | 242                             | 1      | 3   | 1      | 0.012 (1.2)              | –            | 0.333 (33.3) |
| Karachi, Pakistan                                  |                                 |        |     |        |                          |              |              |
| Afghanistan (U.S. Army deploys)                    |                                 |        |     |        |                          |              |              |
| Southeast Asia Region (31)                         | 27,276                          | 3,608  | 238 | 65     | 0.087 (8.7)              | 0.066 (6.6)  | 0.273 (27.3) |
| Aligarh, Uttar Pradesh, India                      |                                 |        |     |        |                          |              |              |
| Bikaner, Rajasthan, India                          |                                 |        |     |        |                          |              |              |
| Chandigarh and Gujarat territories, India          |                                 |        |     |        |                          |              |              |
| Dehradun, Uttarakhand, India                       |                                 |        |     |        |                          |              |              |
| Delhi, India                                       |                                 |        |     |        |                          |              |              |
| Grande Noida, Uttar Pradesh, India                 |                                 |        |     |        |                          |              |              |
| Madhya Pradesh, India                              |                                 |        |     |        |                          |              |              |
| Mangalore, Karnataka State, India                  |                                 |        |     |        |                          |              |              |
| Manipal, Karnataka, India                          |                                 |        |     |        |                          |              |              |
| Mumbai, India                                      |                                 |        |     |        |                          |              |              |
| New Delhi, North India                             |                                 |        |     |        |                          |              |              |
| Pipariya, Vadodara, India                          |                                 |        |     |        |                          |              |              |
| Rajkot, Gujarat, Western India                     |                                 |        |     |        |                          |              |              |
| Rohtak, Haryana, India                             |                                 |        |     |        |                          |              |              |
| Uttar Pradesh, India                               |                                 |        |     |        |                          |              |              |
| Himachal Pradesh, India                            |                                 |        |     |        |                          |              |              |
| Timika, Papua, Indonesia                           |                                 |        |     |        |                          |              |              |
| Jayapura, Papua, Indonesia                         |                                 |        |     |        |                          |              |              |
| West Sumba, Indonesia                              |                                 |        |     |        |                          |              |              |
| western pacific region (5)                         | 1,204                           | 163    | 64  | 1      | 0.053 (5.3)              | 0.392 (39.2) | 0.015 (1.5)  |
| Sepik Province, PNG                                |                                 |        |     |        |                          |              |              |
| Madang Province, PNG                               |                                 |        |     |        |                          |              |              |
| Singapore                                          |                                 |        |     |        |                          |              |              |
| Kota Kinabalu, Sabah, Malaysia                     |                                 |        |     |        |                          |              |              |

NMSS = U.S. National Malaria Surveillance System; PM = pulmonary malaria; PNG = Papua New Guinea; SIVIGILA = Public Health Surveillance System from Colombia; WHO = World Health Organization. No study occurred in the European WHO region. Numbers cannot be presented by specific locality in the second column because most studies present data from overlapping localities.
